# Supplementary material
Source: publisher site journal article supplement (https://www.dovepress.com/article/483194)
Supplement: Supplementary file 1 [file get_supplementary_file.php]

### Supplement of other Material

This supplement contains two supplementary figures, and eight supplementary tables.

**Figures**

**
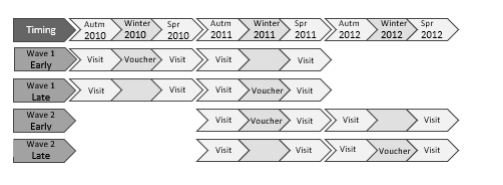
**

**Figure S 1** Study timing and wave design

|  |  | Winter 1 | Winter 2 |
| --- | --- | --- | --- |
| Voucher | Early | $500 | None |
| Late | none | $500 |
| Analysis: primary | Early | Test |  |
| Late | Contrast |  |
| Analysis:  Cross Over | Early | Test | Contrast |
| Late | Contrast | Test |
| Analysis: Wedge | Early | Test | Test |
| Late | Contrast | Test |
| Analysis: Continuation | Early | Test | Test |
| Late | Contrast | Contrast |

**Figure S 2** Analysis methods and assumptions about study effect

**Tables**

The tables presented in this supplement are primarily extensions or sensitivity analyses of tables presented in the main paper. However, Tables S1, S7, and S8 do not relate to any of the tables directly in the body of the paper. Table S1 shows the baseline characteristics of participants assigned to each randomisation group. Table S7 shows the effect sizes for different analyses of the temperature data. Table S8 compares energy use in the baseline year with health conditions in the baseline year.

Table S1 presents information on the quality of the randomisation and pre-study participant health.

**Table S1**: Pre-study participant demographics and health.

|  |  |  | Randomised to “Early Intervention” | Randomised to “Late” intervention | chisqp |
| --- | --- | --- | --- | --- | --- |
| Demographics | Sex | Female | 50% ( 114 / 229) | 50% ( 114 / 229) | >0.999 |
|  | Age-group | <65 | 27% ( 62 / 229 ) | 26% ( 58 / 229 ) | 0.9074 |
|  |  | 65-74 | 38% ( 87 / 229 ) | 38% ( 88 / 229 ) |
|  |  | 75+ | 35% ( 80 / 229 ) | 36% ( 83 / 229 ) |
|  | Ethnicity | Maori | 18% ( 42 / 229) | 22% ( 50 / 229) | 0.3508 |
| Comorbidities | Individual | Heart | 51% ( 111 / 218) | 45% ( 99 / 222) | 0.1843 |
|  |  | Cancer | 17% ( 37 / 222) | 14% ( 32 / 221) | 0.5256 |
|  |  | Liver | 2% ( 5 / 220) | 6% ( 14 / 221) | 0.0357 |
|  |  | Renal | 9% ( 19 / 221) | 8% ( 17 / 218) | 0.7603 |
|  |  | Diabetes | 17% ( 38 / 220) | 18% ( 39 / 219) | 0.8827 |
|  |  | Arthritis | 51% ( 112 / 220) | 57% ( 126 / 221) | 0.1984 |
|  |  | Asthma | 64% ( 140 / 220) | 69% ( 153 / 223) | 0.2687 |
|  | Number of * comorbidities | 0 | 36% ( 78 / 214 ) | 41% ( 86 / 210 ) | 0.4811 |
|  |  | 1 | 40% ( 85 / 214 ) | 40% ( 83 / 210 ) |
|  |  | 2+ | 24% ( 51 / 214 ) | 20% ( 41 / 210 ) |
| COPD flareups | Total number of exacerbations | 0 | 21% ( 49 / 235 ) | 23% ( 54 / 234 ) | 0.3072 |
|  |  | 1 | 21% ( 50 / 235 ) | 19% ( 45 / 234 ) |
|  |  | 2 or 3 | 38% ( 90 / 235 ) | 44% ( 103 / 234 ) |
|  |  | 4+ | 20% ( 46 / 235 ) | 14% ( 32 / 234 ) |
|  | Exacerbations with antibiotics/ cortio-steriods / hospitalisations | 0 | 26% ( 62 / 235 ) | 27% ( 63 / 234 ) | 0.3415 |
|  |  | 1 | 20% ( 46 / 235 ) | 19% ( 45 / 234 ) |
|  |  | 2 or 3 | 36% ( 85 / 235 ) | 41% ( 97 / 234 ) |
|  |  | 4+ | 18% ( 42 / 235 ) | 12% ( 29 / 234 ) |
| *Co-morbidities included in the “number of comorbidities” are self-reported heart disease, cancer liver disease, kidney disease, and diabetes. | | | | | |

**Table S1 continued**: Pre-study participant demographics and health.

|  |  |  | Randomised to “Early Intervention” | Randomised to “Late” intervention | chisqp |
| --- | --- | --- | --- | --- | --- |
| Activities of Daily Life | Distance can walk | 500m+ | 36% ( 82 / 226 ) | 37% ( 83 / 227 ) | 0.9981 |
|  |  | 51-499m | 38% ( 87 / 226 ) | 38% ( 87 / 227 ) |
|  |  | <50m | 25% ( 57 / 226 ) | 25% ( 57 / 227 ) |
|  | Steps | No difficulty | 27% ( 61 / 226 ) | 25% ( 56 / 226 ) | 0.8513 |
|  |  | Difficulty | 50% ( 113 / 226 ) | 52% ( 118 / 226 ) |
|  |  | Need help or cannot do | 23% ( 52 / 226 ) | 23% ( 52 / 226 ) |
|  | Housework | No difficulty | 50% ( 113 / 227 ) | 51% ( 117 / 228 ) | 0.1830 |
|  |  | Difficulty | 35% ( 79 / 227 ) | 28% ( 64 / 228 ) |
|  |  | Need help or cannot do | 15% ( 35 / 227 ) | 21% ( 47 / 228 ) |
|  | Difficulties eating | No difficulty | 90% ( 199 / 221 ) | 88% ( 197 / 225 ) | 0.6728 |
|  |  | Difficulty | 9% ( 19 / 221 ) | 11% ( 25 / 225 ) |
|  |  | Need help or cannot do | 1% ( 3 / 221 ) | 1% ( 3 / 225 ) |  |
| Health care | Preventative care | Flu vax | 82% ( 186 / 228) | 86% ( 196 / 227) | 0.1662 |
|  |  | Pneumo vax | 22% ( 46 / 208) | 24% ( 49 / 207) | 0.7060 |
|  | Health professionals | Saw GP for COPD | 85% ( 188 / 222) | 83% ( 185 / 224) | 0.5498 |
|  |  | Saw GP for not COPD | 55% ( 121 / 222) | 62% ( 139 / 224) | 0.1060 |
|  |  | Saw nurse for COPD | 27% ( 52 / 193) | 27% ( 55 / 204) | 0.9968 |
|  |  | Saw nurse for not COPD | 41% ( 80 / 193) | 36% ( 73 / 204) | 0.2463 |
|  | Home oxygen | On | 11% ( 24 / 228) | 7% ( 15 / 228) | 0.1318 |
|  |  | <10 hrs /day | 9% ( 2 / 23) | 7% ( 1 / 14) | 0.5046 |
|  |  | 10-<20 hrs/day | 78% ( 18 / 23) | 64% ( 9 / 14) |
|  |  | 20+ hrs/day | 13% ( 3 / 23) | 29% ( 4 / 14) |
| Control conditions |  | Diarrhoea | 74% ( 166 / 225) | 70% ( 156 / 223) | 0.3682 |
|  |  | Vomiting | 85% ( 191 / 225) | 84% ( 188 / 223) | 0.8641 |

Table S2 expands the raw data presented in Table 1 to cover other levels of self-reported exacerbation.

**Table S2:** Raw numbers of self-reported data for first winter of study for other three levels of self-reported exacerbation

|  |  | | Exacerbations with hospitalisation | | Any exacerbation with health care access | | Any exacerbation | |
| --- | --- | --- | --- | --- | --- | --- | --- | --- |
|  |  | | Control | Intervention | Control | Intervention | Control | Intervention |
| Number of exacerbations | 0 | | 183 | 186 | 74 | 89 | 70 | 78 |
| 1 | | 11 | 21 | 58 | 50 | 59 | 57 |
| 2 | | 8 | 4 | 39 | 33 | 39 | 33 |
| 3 | | 2 | 0 | 24 | 24 | 25 | 24 |
| 4 | | 1 | 1 | 7 | 11 | 8 | 11 |
| 5 | | 0 | 0 | 1 | 1 | 1 | 1 |
| 6 | | 0 | 0 | 1 | 0 | 1 | 0 |
| 7 | | 0 | 0 | 0 | 0 | 0 | 0 |
| 8 | | 0 | 2 | 1 | 6 | 2 | 10 |
| Number of participants | | | 205 | 214 | 205 | 214 | 205 | 214 |
| Participants with same level exacerbation in pre-study period | | | 47 | 54 | 150 | 161 | 153 | 165 |
| Participants without same level exacerbation in pre-study period | | | 155 | 156 | 52 | 49 | 49 | 45 |
| Unknown exacerbation status in the pre-study period | | | 3 | 4 | 3 | 4 | 3 | 4 |
| Exacerbations | Overall Number | | 37 | 49 | 255 | 285 | 271 | 324 |
| Overall Rate (Standard Error) | | 0.18 (0.04) | 0.23 (0.06) | 1.24 (0.09) | 1.33 (0.12) | 1.32 (0.10) | 1.51 (0.13) |
| With prior exacerbation | Number | 19 | 36 | 225 | 246 | 239 | 288 |
| Rate (Standard Error) | 0.40 (0.11) | 0.67 (0.22) | 1.50 (0.11) | 1.53 (0.14) | 1.56 (0.12) | 1.75 (0.16) |
| Without prior exacerbation | Number | 15 | 13 | 25 | 31 | 27 | 28 |
| Rate (Standard Error) | 0.10 (0.04) | 0.08 (0.03) | 0.48 (0.10) | 0.63 (0.16) | 0.55 (0.11) | 0.62 (0.14) |

Tables S3a – S3c are sensitivity analyses of the information presented in Table 2. Table S3a both covers more levels of self-reported exacerbation than presented in Table 2, and also considers both a binary model and a negative binomial model of the data. Table S3b is a sensitivity analysis considering the effect of excluding the data from Christchurch after the earthquake. Table S3c contains sensitivity analyses considering different ways of modelling when data from second year is included: the methods used are crossover style, first-winter (continuation) style and wedge style (see Figure S2).

Owing to the low numbers of deaths it was inappropriate to use the post-earthquake Christchurch variable (one participant person died during the winter of 2012 in Christchurch, and none during the winter of 2011).

**Table S3a** Sensitivity analyses: All levels of self-reported exacerbations – First winter only - negative binomial and binary models (data includes post-earthquake Christchurch, standard RCT model formulation). Data from the first three columns of the second row are presented in the main table 2.

|  | | Negative Binomial model | | | Binary Model | | |
| --- | --- | --- | --- | --- | --- | --- | --- |
|  | | Unadjusted model - Intervention only | Intervention, prior usage and demographics* | Intervention, prior usage, demographics* and ancillary ** | Unadjusted model - Intervention only | Intervention, prior usage and demographics * | Intervention, prior usage, demographics* and ancillary ** |
| Exacerbation resulting in Hospitalisation | Coefficient  p-value  95%CI | 0.163  p=0.7248  -4.337 – 4.664 | 0.199  p=0.6650  -4.158 – 4.556 | 0.191  p=0.6719  -4.098 – 4.481 | 0.412  p= 0.7548  -12.495 – 13.318 | 0.483  p= 0.5424  -6.536 – 7.502 | 0.481  p= 0.5432  -6.518 – 7.479 |
| Exacerbation resulting in antibiotics, steroids or hospitalisation | Coefficient  p-value  95%CI | 0.087  p=0.5925  -1.397 – 1.571 | 0.090  p=0.5831  -1.404 – 1.584 | 0.089 p=0.5875  -1.406 –  1.584 | -0.086  p= 0.7400  -2.616 – 2.444 | -0.0938  p= 0.7382  -2.827 – 2.640 | -0.099  p= 0.7250  -2.841 – 2.642 |
| Exacerbation resulting in any health care usage | Coefficient  p-value 95%CI | 0.066  p=0.6772  -1.434 – 1.565 | 0.0440 p=0.7728  -1.456 – 1.544 | 0.044 p=0.7712  -1.46 –  1.55 | -0.232  p= 0.4552  -2.785 – 2.322 | -0.289  p= 0.4070  -3.017 – 2.440 | -0.293  p= 0.4032  -3.027 – 2.441 |
| Any reported exacerbation | Coefficient  p-value 95%CI | 0.101  p=0.5486  -1.398 – 1.600 | 0.090  p=0.5722  -1.343 – 1.522 | 0.091  p=0.5695  -1.346 – 1.528 | -0.101  p= 0.7085  -2.701 – 2.499 | -0.144  p= 0.6256  -2.897 – 2.608 | -0.148  p= 0.6187  -2.905 – 2.609 |
| *Prior usage and Demographics include: 3 age bands, gender, ethnicity, the study area, and a binary variable indicating if the exacerbation level of interest had been reported in the period prior to the study commending.  **Ancillary include: study wave, whether it was the first or second winter in the study, and if the data were collected from Christchurch post-earthquake. | | | | | | | |

**Table S3b:** Sensitivity Analysis – All levels of self-reported exacerbation – First winter only – data excludes post-earthquake Christchurch, (standard RCT model formulation, negative binomial model coefficients only)

|  | | Negative Binomial Model | | |
| --- | --- | --- | --- | --- |
| Unadjusted model - Intervention only | Intervention, prior usage and demographics* | Intervention, prior usage, demographics* and ancillary** |
| Exacerbation resulting in Hospitalisation | Coefficient  p-value  95%CI | 0.094  p=0.8346  -4.379 – 4.566 | 0.215  p=0.6457  -4.171 –4.600 | 0.217  p=0.6435  -4.176 –4.610 |
| Exacerbation resulting in antibiotics, steroids or hospitalisation | Coefficient  p-value  95%CI | 0.091  p=0.5897  -1.455 –1.638 | 0.097  p=0.5695  -1.442 –1.636 | 0.097  p=0.5703  -1.443 –1.637 |
| Exacerbation resulting in any health care usage | Coefficient  p-value  95%CI | 0.058  p=0.7197  -1.497 –1.612 | 0.040  p=0.7946  -1.497 –1.578 | 0.040  p=0.7953  -1.497 –1.578 |
| Any reported exacerbation | Coefficient  p-value  95%CI | 0.096  p=0.5780  -1.465 –1.657 | 0.083  p=0.6069  -1.404 – 1.570 | 0.084  p=0.6052  -1.404 –1.572 |
| *Prior usage and Demographics include: 3 age bands, gender, ethnicity, the study area, and a binary variable indicating if the exacerbation level of interest had been reported in the period prior to the study commending.  **Ancillary include: study wave, whether it was the first or second winter in the study, and if the data were collected from Christchurch post-earthquake. | | | | |

**Table S3c:** Sensitivity Analysis – All levels of self-reported exacerbation – alternate models for intervention effect (including post-earthquake Christchurch data, data from both winters, negative binomial coefficients only)

|  |  | Crossover model (randomisation allocation) | | | Continuation model (first winter allocation applied through both winters) | | | Wedge model | | |
| --- | --- | --- | --- | --- | --- | --- | --- | --- | --- | --- |
|  |  | Intervention only | Intervention, prior usage and demographics* | Intervention, prior usage, demographics* and ancillary** | Intervention only | Intervention, prior usage and demographics* | Intervention, prior usage, demographics* and ancillary** | Intervention only | Intervention, prior usage and demographics * | Intervention, prior usage, demographics* and ancillary** |
| Exacerbation resulting in Hospitalisation | Coeff.  p-value  95%CI | 0.065  p=0.7994  -0.437 –0.567 | 0.023  p=0.9282  -0.476 –0.521 | 0.037 p=0.8845  -0.460 –0.534 | 0.140 p=0.6337  -0.436 –0.716 | 0.234 p=0.4151  -0.330 –0.797 | 0.221 p=0.4314  -0.332 –0.774 | 0.055  p=0.8561  -0.536 –0.645 | 0.159  p=0.5996  -0.436 –0.754 | 0.217  p=0.5450  -0.487 –0.921 |
| Exacerbation resulting in antibiotics, steroids or hospitalisation | Coeff.  p-value  95%CI | 0.009 p=0.8972  -0.127 –0.145 | 0.003 p=0.9656  -0.136 –  0.142 | -0.001 p=0.9868  -0.140 –  0.137 | 0.028  p=0.7884  -0.177 –  0.233 | 0.058  p=0.5473  -0.132 –  0.248 | 0.057 p=0.5541  -0.133 –  0.247 | -0.065  p=0.4630  -0.237 –  0.108 | -0.049  p=0.5800  -0.221 –  0.124 | 0.034  p=0.7508  -0.178 –  0.247 |
| Exacerbation resulting in any health care usage | Coeff.  p-value  95%CI | -0.003  p= 0.9610  -0.138 –  0.131 | -0.013 p=0.8497  -0.151 –  0.124 | -0.016 p=0.8221  -0.154 –  0.122 | 0.007  p=0.9486  -0.197 –  0.210 | 0.011  p=0.9142  -0.183 –  0.204 | 0.010 p=0.9217  -0.184 –  0.203 | -0.068  p=0.4354  -0.238 –  0.103 | -0.064  p=0.4651  -0.236 –  0.108 | -0.013  p=0.9048  -0.227 –  0.201 |
| Any reported exacerbation | Coeff.  p-value  95%CI | 0.031  p=0.6635  -0.109 –  0.171 | 0.023 p=0.7519  -0.120 –  0.166 | 0.018  p=0.8079  -0.125 –  0.160 | 0.063 p=0.5323  -0.135 –  0.260 | 0.069  p=0.4569  -0.113 –  0.251 | 0.068 p=0.4638  -0.114 –  0.250 | -0.048  p=0.5942  -0.223 –  0.128 | -0.042  p=0.6349  -0.217 –  0.132 | 0.0654  p=0.5452  -0.147 –  0.278 |
| *Prior usage and Demographics include: 3 age bands, gender, ethnicity, the study area, and a binary variable indicating if the exacerbation level of interest had been reported in the period prior to the study commending.  **Ancillary include: study wave, whether it was the first or second winter in the study, and if the data were collected from Christchurch post-earthquake. | | | | | | | | | | |

Table S4 contains analyses of deaths using both years of data, and different assumptions about the effect of the intervention timing in the second years

**Table S4**: Absolute numbers of participant death and odds ratios; methods for two years of analysis

|  | Absolute Numbers | | | Odds ratios - comparing intervention group to control | | | |
| --- | --- | --- | --- | --- | --- | --- | --- |
|  |  | Intervention  Group | Control group |  | Intervention only – unadjusted | Intervention, adjusted for prior usage and demographics * | Intervention, adjusted for prior usage, demographics* and ancillary ** |
| Death winter – continuation | Deaths  Live at start of winter | 2  408 | 11  396 | Coeff.  p-value  95%CI | 0.170  p=0.0220  0.037 -0.774 | 0.196  p=0.0375  0.042 - 0.910 | 0.195  p=0.0375  0.042 - 0.910 |
| Death winter - crossover | Deaths  Live at start of winter | 7  399 | 6  405 | Coeff.  p-value  95%CI | 1.190  p=0.7567  0.396 -3.576 | 1.229  p=0.7200  0.398- 3.792 | 1.211  p=0.7396  0.391 - 3.756 |
| Death winter - wedge | Deaths  Live at start of winter | 8  599 | 5  205 | Coeff.  p-value  95%CI | 0.540  p=0.2858  0.175-1.673 | 0.651  p=0.4739  0.201 -2.106 | 0.643  p=0.4629  0.197 - 2.093 |
| Death long winter – continuation | Deaths  Live at start of winter | 6  408 | 19  396 | Coeff.  p-value  95%CI | 0.292  p=0.0095  0.115-0.741 | 0.327  p=0.0202  0.127 - 0.840 | 0.329  p=0.0212  0.128 - 5.131 |
| Death long winter - crossover | Deaths  Live at start of winter | 12  399 | 13  405 | Coeff.  p-value  95%CI | 0.936  p=0.8719  0.421 -2.081 | 0.951  p=0.9037  0.422-2.145 | 0.941  p=0.8837  0.417 -2.125 |
| Death long winter - wedge | Deaths  Live at start of winter | 15  599 | 10  205 | Coeff.  p-value  95%CI | 0.499  p=0.0960  0.220 - 1.131 | 0.564  p=0.1811  0.244 -1.305 | 0.562  p=0.1798  0.242 - 1.304 |
| A restricted subset of explanatory variables was used in this analysis due to the rarer outcome  *Prior usage and Demographics include: 2 age bands, gender, ethnicity, the study area, and a binary variable indicating if the exacerbation level of interest had been reported in the period prior to the study commending.  **Ancillary include: study wave, a modified binary Charlson index | | | | | | | |

Supplementary Table 5 shows the total counts and the numbers of participants hospitalised over the study.

**Table S5:** Hospitalisations over study period: number of participants hospitalised and total count of hospitalisations

|  |  | Winter prior to study | | Winter 1 of study | | Winter 2 of study | |
| --- | --- | --- | --- | --- | --- | --- | --- |
| Received Voucher Winter 1 | Received Voucher Winter 2 | Received Voucher Winter 1 | Received Voucher Winter 2 | Received Voucher Winter 1 | Received Voucher Winter 2 |
| All Cause | Hospitalisations  Participants hospitalised | 53  35 | 53  40 | 47  31 | 35  28 | 48  32 | 57    40 |
| All respiratory | Hospitalisations  Participants hospitalised | 34    21 | 33  28 | 29  19 | 21  18 | 31  21 | 31    23 |
| Respiratory –  J40-J47 - COPD/Asthma | Hospitalisations  Participants hospitalised | 31  19 | 27  23 | 25  16 | 18  15 | 30    20 | 27  21 |
| Respiratory –  Only J44 - COPD | Hospitalisations  Participants hospitalised | 30  18 | 23    20 | 25    16 | 16  13 | 28  18 | 27  21 |
| All circulatory | Hospitalisations  Participants hospitalised | 6  6 | 4  4 | 6  4 | 7  6 | 7    6 | 10    9 |
| Number of participants |  | 208 | 205 | 208 | 205 | 200 | 191 |

Tables 6a to 6c are sensitivity analyses of the information presented in Table 4. Table S6a considers a binary model of the data. Table S6b is a sensitivity analysis considering the effect of excluding the data from Christchurch after the earthquake. Table S6c contains sensitivity analyses considering different ways of modelling the data when the second year is included. The wedge style sensitivity analysis showed hospitalisations for just COPD approaching statistical significance for the analyses that did not include the ancillary variables, however the ancillary variables were particularly important for this analysis to account for timing issues.

**Table S6a**: Hospitalisation by NHI record - first winter only - binary model (data includes post-earthquake Christchurch, standard RCT model formulation)

|  | | Binary model – hospitalised or not | | |
| --- | --- | --- | --- | --- |
|  | | Intervention only | Intervention, prior usage and demographics* | Intervention, prior usage, demographics* and ancillary** |
| All cause hospitalisation | Coefficient  p-value  95%CI | 0.102  p= 0.7179  -0.452 - 0.655 | 0.150  p= 0.6009  -0.413 - 0.714 | 0.146  p= 0.6124  -0.419 - 0.710 |
| J40-J47 | Coefficient  p-value  95%CI | 0.0541  p= 0.8850  -0.681 - 0.789 | 0.0510  p= 0.8929  -0.693 - 0.795 | 0.0293  p= 0.9389  -0.721 - 0.779 |
| Only J44 | Coefficient  p-value  95%CI | 0.208  p= 0.5920  -0.553 - 0.969 | 0.203  p= 0.6035  -0.566 - 0.973 | 0.188  p= 0.6337  -0.587 - 0.964 |
| Circulatory hospitalisation | Coefficient  p-value  95%CI | -0.430  p= 0.5104  -1.714 - 0.854 | -0.358  p= 0.5943  -1.677 - 0.961 | -0.369  p= 0.5907  -1.718 - 0.980 |
| *Prior usage and Demographics include: 3 agebands, gender, ethnicity, the study area, and a binary variable indicating if the hospitalisation of interest had occurred in the winter prior to the study commending.  **Ancillary include: study wave, whether it was the first or second winter in the study, and if the data were collected from Christchurch post-earthquake | | | | |

**Table S6b**: Sensitivity Analysis – NHI hospitalisation data – First winter only - data excludes post-quake Christchurch (standard RCT model formulation, negative binomial model coefficients only)

|  |  | Model based on just first winter – excluding post earthquake Christchurch | | |
| --- | --- | --- | --- | --- |
|  |  | Intervention only | Intervention, prior usage and demographics * | Intervention, prior usage, demographics* and ancillary** |
| All cause hospitalisation | Coefficient  p-value  95%CI | 0.218  p= 0.4519  -0.351 –0.787 | 0.306  p= 0.2983  -0.271 –0.883 | 0.3055  p= 0.2983  -0.271 – 0.882 |
| J40-J47 | Coefficient  p-value  95%CI | 0.0519  p= 0.9015  -0.773 –0.8765 | 0.126  p= 0.7652  -0.701 – 0.952 | 0.138  p= 0.7439  -0.690 – 0.966 |
| Only J44 | Coefficient  p-value  95%CI | 0.177  p= 0.6880  -0.689 – 1.044 | 0.272  p= 0.5412  -0.602 –1.145 | 0.275  p= 0.5364  -0.599 – 1.148 |
| Circulatory hospitalisation | Coefficient  p-value  95%CI | -0.005  p= 0.9945  -1.484 –1.473 | -0.340  p= 0.6767  -1.944 –1.263 | -0.316  p= 0.6983  -1.920 –1.288 |
| *Prior usage and Demographics include: 3 age bands, gender, ethnicity, the study area, and a binary variable indicating if the hospitalisation of interest had occurred in the winter prior to the study commending.  **Ancillary include: study wave, whether it was the first or second winter in the study, and if the data were collected from Christchurch post-earthquake | | | | |

**Table S6c**: Sensitivity Analysis Negative binomial modelling of hospitalisations by NHI - alternate model formulations (including post-quake Christchurch, data from both winters, negative binomial coefficients only) – crossover style, first winter allocation style, and wedge style.

|  |  | Model based on randomisation allocation | | | Model based on first winter allocation | | | Model based on wedge allocation | | |
| --- | --- | --- | --- | --- | --- | --- | --- | --- | --- | --- |
|  |  | Intervention only | Intervention, prior usage and demographics * | Intervention, prior usage, demographics* and ancillary** | Intervention only | Intervention, prior usage and demographics* | Intervention, prior usage, demographics* and ancillary** | Intervention only | Intervention, prior usage and demographics* | Intervention, prior usage, demographics* and ancillary** |
| All cause hospitalisation | Coeff.  p-value  95%CI | 0.243 p=0.1724  -0.107 –  0.593 | 0.260  p=0.1450  -0.090 –  0.610 | 0.258 p=0.1416  -0.086 –  0.603 | -0.0303 p=0.8840  -0.438 –  0.378 | 0.067 p=0.7434  -0.335 –  0.469 | 0.075 p=0.7217  -0.328 –  0.473 | 0.447  p=0.052  -0.004 –  0.898 | 0.509  p=0.0264  0.0599 –  0.958 | 0.390  p=0.1614  -0.157 –  0.936 |
| J40-J47 | Coeff.  p-value  95%CI | 0.083  p=0.7217  -0.373 –  0.538 | 0.077  p=0.7430  -0.383 –  0.537 | 0.108  p=0.6372  -0.343 –  0.560 | 0.0484  p=0.8741  -0.553 –  0.649 | 0.113 p=0.7047  -0.471 –  0.697 | 0.1014 p=0.7348  -0.487 –  0.689 | 0.470  p=0.1332  -0.144 –  1.084 | 0.478  p=0.1247  -0.133 –  1.089 | 0.237  p=0.5407  -0.523 –  0.996 |
| Only J44 | Coeff.  p-value  95%CI | 0.189  p=0.4300  -0.281 –  0.658 | 0.179 p=0.4596  -0.296 –  0.653 | 0.222 p=0.3467  -0.241 –  0.684 | 0.044 p=0.8908  -0.590 –  0.679 | 0.101 p=0.7468  -0.512 –  0.713 | 0.091  p=0.7718  -0.527 –  0.709 | 0.602  p=0.0688  -0.0467 –  1.252 | 0.599  p=0.0684  -0.045 –  1.244 | 0.395  p=0.328  -0.398 –  1.187 |
| Circulatory hospitalisation | Coeff.  p-value  95%CI | 0.140  p=0.7460  -0.707 –  0.986 | 0.102  p=0.8112  -0.740 –  0.944 | 0.0707 p=0.8701 #  -0.779 –  0.920 | -0.350  p=0.4410  -1.243 –  0.542 | -0.09695 p=0.8279  -0.973 – 0.779 | # | -0.350  p= 0.4410  -1.243 –  0.542 | 0.268  p=0.5987  -0.731 –  1.266 | -0.019  p=0.977  -1.295 –  1.258 |
| *Prior usage and Demographics include: 3 age bands, gender, ethnicity, the study area, and a binary variable indicating if the hospitalisation of interest had occurred in the winter prior to the study commending.  **Ancillary include: study wave, whether it was the first or second winter in the study, and if the data were collected from Christchurch post-earthquake  # low numbers of circulatory admissions across the study combined with few participants being recruited in Christchurch after the earthquakes led to low numbers of circulatory admissions in Christchurch after the earthquake in this sample and problems with estimation of this number. | | | | | | | | | | |

Table S7 shows the effects of the intervention on the temperature measurements. The hours were divided into four six hour blocks, and the effects of the voucher under the assumptions corresponding to the different analysis patterns considered. Three different measures of temperature are reported.

**Table S7**: Effects at different times of day under different measures of temperature

|  | | First winter only | | | Both winters model based on first winter allocation – continuation analysis | | | Model based on randomisation allocation – cross over analysis | | | Model wedge analysis | | |
| --- | --- | --- | --- | --- | --- | --- | --- | --- | --- | --- | --- | --- | --- |
|  | | Average Temp. | Ever below 12˚C | Degree Hours below 18˚C | Average Temp. | Ever below 12˚C | Degree Hours below 18˚C | Average Temp. | Ever below 12˚C | Degree Hours below 18˚C | Average Temp. | Ever below 12˚C | Degree Hours below 18˚C |
| Morning | Coeff.  p-val.  95%CI | 0.19 p=0.4701  -0.3237 - 0.7003 | -0.22 p=0.3621  -0.6801 - 0.2489 | -21.06 p=0.5473  -89.7803 - 47.6647 | 0.17 p=0.4871  -0.3101 - 0.6497 | -0.05 p=0.7881  -0.4496 - 0.3414 | -13.52 p=0.6753  -76.9277 - 49.8839 | 0.07 p=0.5583  -0.168 - 0.3106 | 0.17 p=0.3286  -0.1732 - 0.5157 | 0.37 p=0.9823  -32.5462 - 33.2888 | 0.20 p=0.2581 -0.1444 - 0.5344 | -0.59 p=0.0106  -1.0348 - -0.1387 | -35.25 p=0.1341  -81.4836 - 10.9 |
| Afternoon | Coeff.  p-val.  95%CI | -0.09 p=0.6912  -0.5644 - 0.3745 | 0.08 p=0.7065  -0.3485 - 0.5138 | 14.64 p=0.5178  -29.8246 - 59.1057 | -0.02 p=0.9159  -0.4592 - 0.4123 | 0.13 p=0.486  -0.2323 - 0.4877 | 11.92 p=0.5701  -29.3095 - 53.1535 | 0.16 p=0.1029  -0.03247 - 0.3525 | 0.03 p=0.8703  -0.3021 - 0.3568 | -6.74 p=0.4961  -26.2045 - 12.7246 | -0.18 p=0.2001 -0.4648 - 0.09818 | -0.39 p=0.0503  -0.7878 - 0.000438 | 14.29 p=0.3168  -13.8216 - 42.3996 |
| Evening | Coeff.  p-val.  95%CI | -0.05 p=0.8514 -0.5454 - 0.4505 | -0.02 p=0.9246 -0.4791 - 0.4351 | 7.37 p=0.7447 -37.0997 - 51.8401 | -0.12 p=0.6266 -0.5926 - 0.3573 | 0.17 p=0.3778  -0.2127 - 0.5595 | 16.1 p=0.4405  -24.8881 - 57.0894 | 0.01 p=0.959  -0.2218 - 0.2337 | 0.20 p=0.2536  -0.146 - 0.5511 | 3.83 p=0.7525  -20.0603 - 27.724 | 0.06 p=0.7085 -0.2664 - 0.3911 | -0.29 p=0.165  -0.7058 - 0.1216 | -1.63 p=0.9227  -34.8051 - 31.5416 |
| Night | Coeff.  p-value  95%CI | 0.15 p=0.5346  -0.3293 - 0.6337 | -0.01 p=0.9642  -0.4516 - 0.4315 | -22.87 p=0.4816  -86.7185 - 40.9705 | 0.07 p=0.7524  -0.3851 - 0.5324 | -0.07 p=0.7166  -0.435 - 0.2993 | -7.12 p=0.8139  -66.4914 - 52.2568 | 0.04 p=0.7148  -0.1836 - 0.2675 | -0.07 p=0.6622  -0.396 - 0.252 | 5.8 p=0.7129  -25.1953 - 36.7977 | 0.24 p=0.1386 -0.07929 - 0.5642 | -0.47 p=0.0248  -0.8727 - -0.05988 | -44.47 p=0.0457  -88.0629 - -0.8692 |
| In this table: the average temperature was modelled using a normal distribution, a positive effect size indicates that dwellings with the intervention were warmer on average than the control; ever below12˚C was modelled as a binary outcome, a negative effect size indicates that dwellings with the intervention were less likely to ever be below 12˚C; hours below 18˚C was modelled using a normal distribution, a negative effect size indicates that dwellings with the intervention had fewer hours below 18˚C.  As well as the relevant staging variable the model used here includes categorical variables for: the area, the type of main heater used, the dwelling condition, the study wave, and if the dwelling was in post-quake Christchurch. Also included was a continuous measure of the average external temperature during the month for that hour grouping eg the regressions modelling the effect of the intervention on evening interior temperatures include the exterior average evening temperature. The random intercept was removed from the 1st winter binary analysis | | | | | | | | | | | | | |

Table S8 shows how healthcare use varied according to measured energy use among study participants prior to the study commencing. It shows that the rates of some of the self-reported baseline outcome measures were lower among participants, who had relatively low energy use during the winter prior to study enrolment, however this was not observed among the administrative records for hospitalisation.

**Table S8**: Baseline energy use and baseline health care usage

|  |  | Baseline Low tertile energy use | Baseline Mid tertile energy use | Baseline High tertile energy use | Chisq p |
| --- | --- | --- | --- | --- | --- |
| NHI All-cause hospitalisation | Percentage  Raw number | 17%  18 | 19%  20 | 18%  19 | p=0.9648 |
| NHI J40-J47 hospitalisation | Percentage  Raw number | 9%  9 | 10%  11 | 7%  8 | p= 0.7679 |
| NHI J44 hospitalisation | Percentage  Raw number | 7%  7 | 10%  11 | 7%  8 | p=0.6095 |
| NHI Circulatory hospitalisation | Percentage  Raw number | 3%  3 | 4%  4 | 3%  3 | p=0.9104 |
| Number with baseline NHI hospitalisation data | | 104 | 107 | 107 |  |
| Self-report hospitalisation | Percentage  Raw number | 16%  16 | 29%  28 | 26%  27 | p=0.1070 |
| Self-report exacerbations resulting in hospitalisation, antibiotics or steroids | Percentage  Raw number | 67%  65 | 76%  74 | 77%    79 | p=0.2113 |
| Self-report any healthcare for exacerbations | Percentage  Raw number | 68%  66 | 80%  78 | 82%  84 | p=0.0415 |
| Self-report any exacerbations | Percentage  Raw number | 69%  67 | 82%  80 | 83%  85 | p=0.0306 |
| Number with baseline self-report exacerbation data | | 97 | 98 | 102 |  |
